# Supplementary material for: Evolution of RAS Mutations in Cell-Free DNA of Patients with Tissue RAS Wild-Type Metastatic Colorectal Cancer Receiving First-Line Treatment: The PERSEIDA Study
Source: MDPI journal article supplement (doi:10.3390/cancers14246075), 2022-12-09
Supplement: s1 [file s1]

# Supplementary Materials: Evolution of *RAS* Mutations in Cell-Free DNA of Patients with Tissue *RAS* Wild-Type Metastatic Colorectal Cancer Receiving First-Line Treatment: The PERSEIDA Study

Manuel Valladares-Ayerbes, Pilar Garcia-Alfonso, Jorge Muñoz Luengo, Paola Patricia Pimentel Caceres, Oscar Alfredo Castillo Trujillo, Rosario Vidal-Tocino, Marta Llanos, Beatriz Llorente Ayala, Maria Luisa Limon Miron, Antonieta Salud, Luis Cirera Nogueras, Rocio Garcia-Carbonero, Maria Jose Safont, Esther Falco Ferrer, Jorge Aparicio, Maria Angeles Vicente Conesa, Carmen Guillén-Ponce, Paula Garcia-Tejido, Maria Begoña Medina Magan, Isabel Busquier, Mercedes Salgado, Ariadna Lloansí Vila on behalf of the PERSEIDA Investigators

**Table S1.** Characteristics of patients with *RAS* mutations at any time as per liquid biopsy (codon-exon-aminoacid position/ change).

| Patient | <i>RAS</i> mutant (Exon/Codon/MAF/aminoacid change) |                              |                              | Primary tumor location | Site of metastasis    | Days <sup>a</sup> | First-line treatment | Best overall response <sup>b</sup> | PFS (months) |
|---------|-----------------------------------------------------|------------------------------|------------------------------|------------------------|-----------------------|-------------------|----------------------|------------------------------------|--------------|
|         | Baseline                                            | Week 20                      | Disease progression          |                        |                       |                   |                      |                                    |              |
| 1       | <i>KRAS</i> 2/13/0.032%/G13D                        | Wild-type                    | Wild-type                    | Left colon             | Liver, lung           | 59                | FOLFOX+panitumumab   | PR                                 | 18.5         |
| 2       | <i>KRAS</i> 2/13/0.046%/G13D                        | <i>KRAS</i> 2/13/0.059%/G13D | Wild-type                    | Left colon             | Liver, lung           | 19                | FOLFOX+panitumumab   | PR                                 | 12.7         |
| 3       | <i>KRAS</i> 2/12/2.952%/G12V                        | Not Available                | no PD                        | Left colon             | Liver                 | 43                | FOLFOX+panitumumab   | SD                                 | 17.4         |
| 4       | Wild-type                                           | Not Available                | <i>NRAS</i> 3/61/0.079%/Q61K | Right colon            | Peritoneum            | 512               | FOLFOX+panitumumab   | PR                                 | 13.7         |
| 5       | <i>NRAS</i> 3/61/0.073%/Q61R                        | Not Available                | Wild-type                    | Left colon             | Liver                 | 38                | FOLFOX+panitumumab   | CR                                 | 19.0         |
| 6       | Wild-type                                           | Wild-type                    | <i>KRAS</i> 2/13/0.083%/G13D | Left colon             | Liver, ganglia, other | 25                | FOLFOX+cetuximab     | PR                                 | 8.0          |
| 7       | <i>NRAS</i> 2/12/0.020%/G12D                        | Wild-type                    | no PD                        | Left colon             | Ganglia, other        | 114               | Capecitabine         | SD                                 | 14.5         |

| Patient | RAS mutant (Exon/Codon/MAF/aminoacid change)                 |                                                                    |                                                                                                  | Primary tumor location | Site of metastasis        | Days <sup>a</sup> | First-line treatment | Best overall response <sup>b</sup> | PFS (months) |
|---------|--------------------------------------------------------------|--------------------------------------------------------------------|--------------------------------------------------------------------------------------------------|------------------------|---------------------------|-------------------|----------------------|------------------------------------|--------------|
|         | Baseline                                                     | Week 20                                                            | Disease progression                                                                              |                        |                           |                   |                      |                                    |              |
| 8       | Wild-type                                                    | Wild-type                                                          | <i>KRAS</i><br>3/61/0.790%/Q61H                                                                  | Right colon            | Ganglia                   | 41                | FOLFOX+pani-tumumab  | PR                                 | 19.0         |
| 9       | <i>KRAS</i><br>4/146/0.085%/A146T                            | Wild-type                                                          | <i>KRAS</i><br>4/146/0.041%/A146T                                                                | Left colon             | Liver, lung, ganglia      | 528               | FOLFOX+pani-tumumab  | PR                                 | 7.8          |
| 10      | <i>KRAS</i> 2/12/0.024%/G12C                                 | Not Available                                                      | PD, but sample not available                                                                     | Left colon             | Lung, ganglia, other      | 553               | FOLFOX+pani-tumumab  | PD                                 | 2.0          |
| 11      | <i>KRAS</i> 2/13/0.021%/G13D                                 | Wild-type                                                          | PD, but sample not available                                                                     | Left colon             | Liver, lung               | 42                | FOLFOX+pani-tumumab  | SD                                 | 11.4         |
| 12      | Wild-type                                                    | Wild-type                                                          | <i>KRAS</i><br>2/12/0.188%/G12A                                                                  | Left colon             | Lung, ganglia, peritoneum | 971               | FOLFIRI+cetuximab    | SD                                 | 11.3         |
| 13      | <i>KRAS</i> 2/12/0.057%/G12D                                 | <i>KRAS</i><br>2/12/0.397%/G12D                                    | <i>KRAS</i><br>2/12/0.105%/G12D                                                                  | Left colon             | Ganglia, peritoneum       | 105               | FOLFIRI+pani-tumumab | SD                                 | 5.2          |
| 14      | <i>KRAS</i> 2/12/0.723%/G12R<br><i>NRAS</i> 2/12/0.691%/G12D | <i>KRAS</i><br>2/12/0.566%/G12R<br><i>NRAS</i><br>2/12/0.968%/G12D | PD, but sample not available                                                                     | Left colon             | Liver                     | 13                | FOLFOX+pani-tumumab  | CR                                 | 6.6          |
| 15      | <i>KRAS</i> 2/13/0.222%/G13D                                 | Wild-type                                                          | <i>KRAS</i><br>2/13/0.214%/G13D                                                                  | Left colon             | Liver                     | 7                 | FOLFOX+pani-tumumab  | CR                                 | 9.3          |
| 16      | Wild-type                                                    | Wild-type                                                          | <i>KRAS</i> 3 and 2/61 and 12/0.568% and 0.050%/Q61L and G12V<br><i>NRAS</i><br>2/61/0.467%/Q61K | Left colon             | Liver, lung               | 13                | FOLFOX+pani-tumumab  | PR                                 | 15.3         |
| 17      | <i>KRAS</i> 2/13/6.060%/G13D                                 | Not Available                                                      | no PD                                                                                            | Left colon             | Liver, lung               | 61                | FOLFOX+pani-tumumab  | PR                                 | 5.8          |
| 18      | Wild-type                                                    | Wild-type                                                          | <i>NRAS</i><br>3/61/0.221%/Q61K                                                                  | Left colon             | Liver, adrenal            | 14                | FOLFOX+pani-tumumab  | PR                                 | 6.9          |

| Patient | RAS mutant (Exon/Codon/MAF/aminoacid change) |                          |                                                                                             | Primary tumor location | Site of metastasis     | Days <sup>a</sup> | First-line treatment     | Best overall response <sup>b</sup> | PFS (months) |
|---------|----------------------------------------------|--------------------------|---------------------------------------------------------------------------------------------|------------------------|------------------------|-------------------|--------------------------|------------------------------------|--------------|
|         | Baseline                                     | Week 20                  | Disease progression                                                                         |                        |                        |                   |                          |                                    |              |
| 19      | KRAS 2/12/0.085%/G12C                        | Wild-type                | KRAS<br>2/12/0.773%/G12C                                                                    | Left colon             | Liver, lung            | 14                | FOLFOX+pani-<br>tutumab  | CR                                 | 12.6         |
| 20      | Wild-type                                    | Wild-type                | KRAS 2/12/0.042%/<br>G12C                                                                   | Left colon             | Liver                  | 32                | FOLFOX+pani-<br>tutumab  | PR                                 | 9.9          |
| 21      | Wild-type                                    | Wild-type                | KRAS 2 and 3/12<br>and 61/0.083% and<br>0.112%/G12D and<br>Q61H<br>NRAS<br>2/61/0.112%/Q61K | Left colon             | Liver                  | 21                | FOLFOX+pani-<br>tutumab  | PR                                 | 7.1          |
| 22      | NRAS 3/61/0.163%/Q61K                        | NRAS<br>3/61/0.662%/Q61K | no PD                                                                                       | Left colon             | Lung, gan-<br>glia     | 55                | FOLFOX+pani-<br>tutumab  | NE                                 | 5.3          |
| 23      | Wild-type                                    | Wild-type                | KRAS<br>2/13/0.381%/G13D                                                                    | Left colon             | Liver, gan-<br>glia    | 18                | FOLFOX+pani-<br>tutumab  | PR                                 | 17.5         |
| 24      | Wild-type                                    | Wild-type                | NRAS<br>2/12/0.341%/G12D                                                                    | Left colon             | Liver                  | 17                | FOLFOX+pani-<br>tutumab  | PR                                 | 9.8          |
| 25      | Wild-type                                    | Wild-type                | KRAS<br>3/61/9.038%/Q61H                                                                    | Left colon             | Liver, peri-<br>toneum | 27                | 5-FU-OX+pani-<br>tutumab | PR                                 | 11.4         |
| 26      | KRAS 2/12/5.951%/G12V                        | Wild-type                | KRAS<br>2/12/0.056%/G12V<br>NRAS<br>2/61/0.056%/Q61R                                        | Left colon             | Other                  | 83                | FOLFIRI+pani-<br>tutumab | SD                                 | 17.5         |

a. Days between tissue and sample collection; b. Not confirmed response; Abbreviations: CR; complete response; NE, non-evaluable; PD, progressive disease; PR, partial response; SD, stable disease.

**Table S2.** Univariable and Multivariable Cox Regression Model for Progression Free Survival (Panitumumab Subpopulation).**A. Univariable Analysis.**

| Variable                                                        | <i>n</i> <sup>a</sup> | <i>p</i>     |
|-----------------------------------------------------------------|-----------------------|--------------|
| RAS status at any time (overall) MAF $\geq 1\%$                 | 93                    | 0.230        |
| RAS status at any time (overall) MAF $\geq 0.1\%$               | 93                    | <b>0.147</b> |
| RAS status at any time (overall) MAF $\geq 0.02\%$              | 93                    | <b>0.096</b> |
| Number of affected organs (1, >1)                               | 93                    | 0.371        |
| ECOG Performance Status (0, >0)                                 | 90                    | 0.294        |
| Age                                                             | 93                    | 0.382        |
| Localization (Left colon, Right colon)                          | 93                    | 0.242        |
| Primary tumour surgery (Yes, No)                                | 93                    | 0.335        |
| Köhne prognostic score (low risk, intermediate risk, high risk) | 83                    | 0.420        |

Selection of the variables with a *p* value <0.15 for the overall effect of the variable in the univariate Cox regression model. a. A total of 93 patients of the panitumumab subpopulation had available response data.

**B. Multivariable Model.**

## Summary of the number of event and censored values

| N obs. read | N obs. used | N event | N censored | Percent censored |
|-------------|-------------|---------|------------|------------------|
| 93          | 93          | 84      | 9          | 9.68             |

## Analysis of Maximum Likelihood Estimates

| Analysis of Maximum Likelihood Estimates |                      |                    |                |            |                 |              |                                    |
|------------------------------------------|----------------------|--------------------|----------------|------------|-----------------|--------------|------------------------------------|
| Parameter                                |                      | Parameter Estimate | Standard Error | Chi-Square | Pr > Chi-Square | Hazard Ratio | 95% Hazard Ratio Confidence Limits |
| RAS status at any time (MAF ≥0.02)       | Mutant vs. Wild-type | 0.43120            | 0.25908        | 2.7701     | 0.0960          | 1.539        | 0.926–2.557                        |

Only variable RAS status at any time (MAF >0.02) was included in the model due to association between variables MAF >0.1% and MAF >0.02% (*p* < 0.0001)

**Table S3.** Univariable and Multivariable Linear Regression Model for Tumor Burden (Panitumumab Subpopulation).**A. Univariable Analysis.**

| Effect                         |           | Estimate | Standard Error | t Value | Pr >  t | Lower  | Upper  |
|--------------------------------|-----------|----------|----------------|---------|---------|--------|--------|
| Intercept                      |           | 44.67    | 20.64          | 2.16    | 0.0329  | 3.71   | 85.64  |
| Liver Metastasis               | Yes       | 29.65    | 14.43          | 2.06    | 0.0425  | 1.02   | 58.27  |
|                                | No        | Ref      |                |         |         |        |        |
| cfDNA Baseline                 |           | 0.0002   | 0.00005        | 4.23    | <0.0001 | 0.0001 | 0.0003 |
| RAS Status Baseline MAF ≥0.02% | Wild-type | 12.50    | 19.57          | 0.64    | 0.5243  | -26.33 | 51.34  |
|                                | Mutant    | Ref      |                |         |         |        |        |

Selection of the variables with a *p* value < 0.15 for the overall effect of the variable in the univariate linear regression model.

## B. Multivariable Model.

## Type 3 Tests of Fixed Effects

| Effect                                | F Value | Pr > F  |
|---------------------------------------|---------|---------|
| Liver Metastasis                      | 4.22    | 0.04    |
| cfDNA Baseline                        | 17.91   | <0.0001 |
| RAS Status Baseline MAF $\geq 0.02\%$ | 0.41    | 0.52    |

## Least Squares Means

| Effect           |     | Estimate | Standard Error | t Value | Pr >  t | Lower | Upper  |
|------------------|-----|----------|----------------|---------|---------|-------|--------|
| Liver metastasis | Yes | 95.25    | 10.65          | 8.95    | <0.0001 | 74.12 | 116.38 |
|                  | No  | 65.60    | 14.01          | 4.68    | <0.0001 | 37.79 | 93.41  |

## Differences of Least Squares Means

| Effect           |           | Estimate | Standard Error | t Value | Pr >  t | Lower | Upper |
|------------------|-----------|----------|----------------|---------|---------|-------|-------|
| Liver metastasis | Yes vs No | 29.65    | 14.43          | 2.06    | 0.04    | 1.02  | 58.27 |
